# Supplementary material for: Exploring the Interplay between Tribocorrosion and Surface Chemistry of the ASTM F139 Surgical Stainless Steel in Phosphate-Buffered Saline Solution
Source: MDPI journal article supplement (doi:10.3390/ma17102295), 2024-05-13
Supplement: s1 [file s1]

# Supplementary Materials

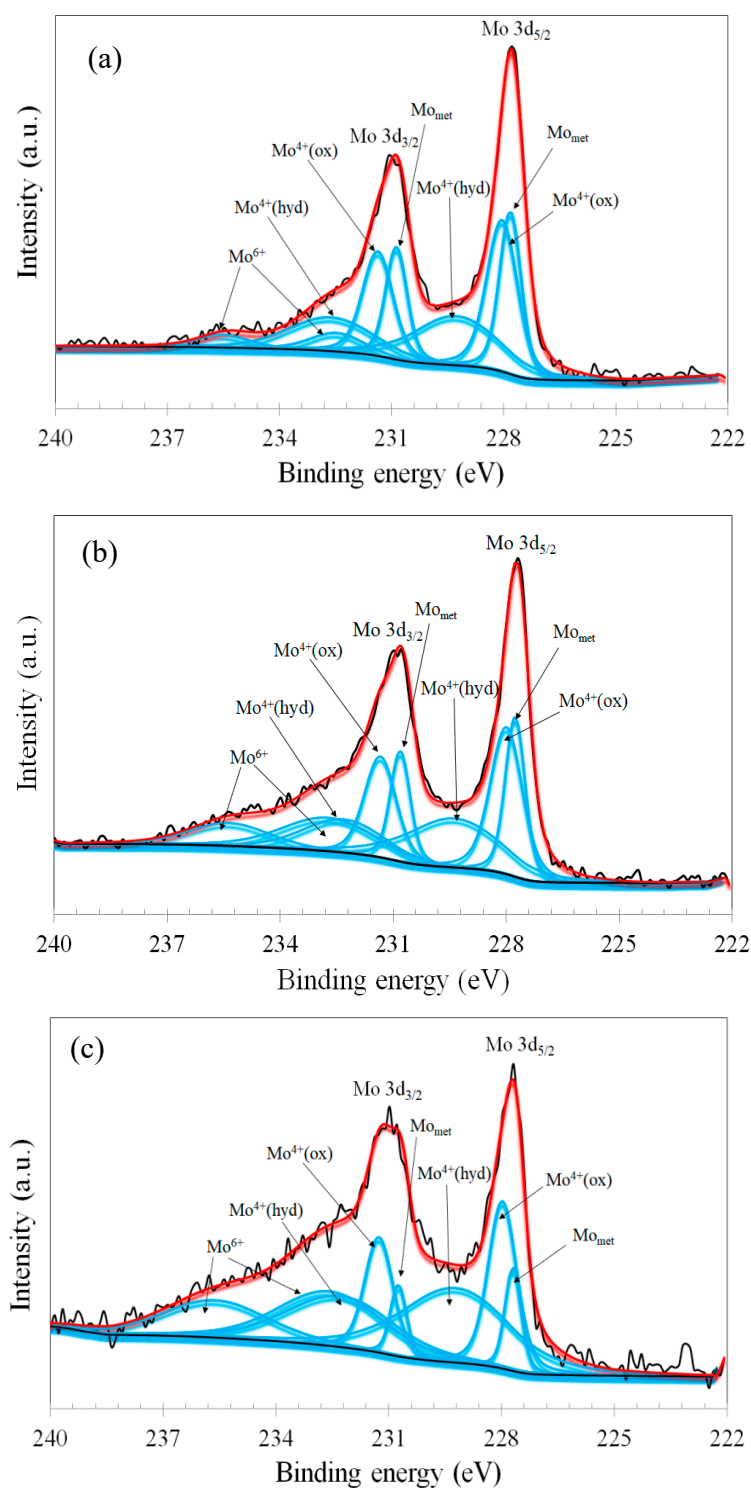

Figure S1. XPS narrow scan spectra in the Mo 3d region: a) naturally formed passive film; b) wear track of the OCP sample; c) wear track of the -100 mV vs. OCP.

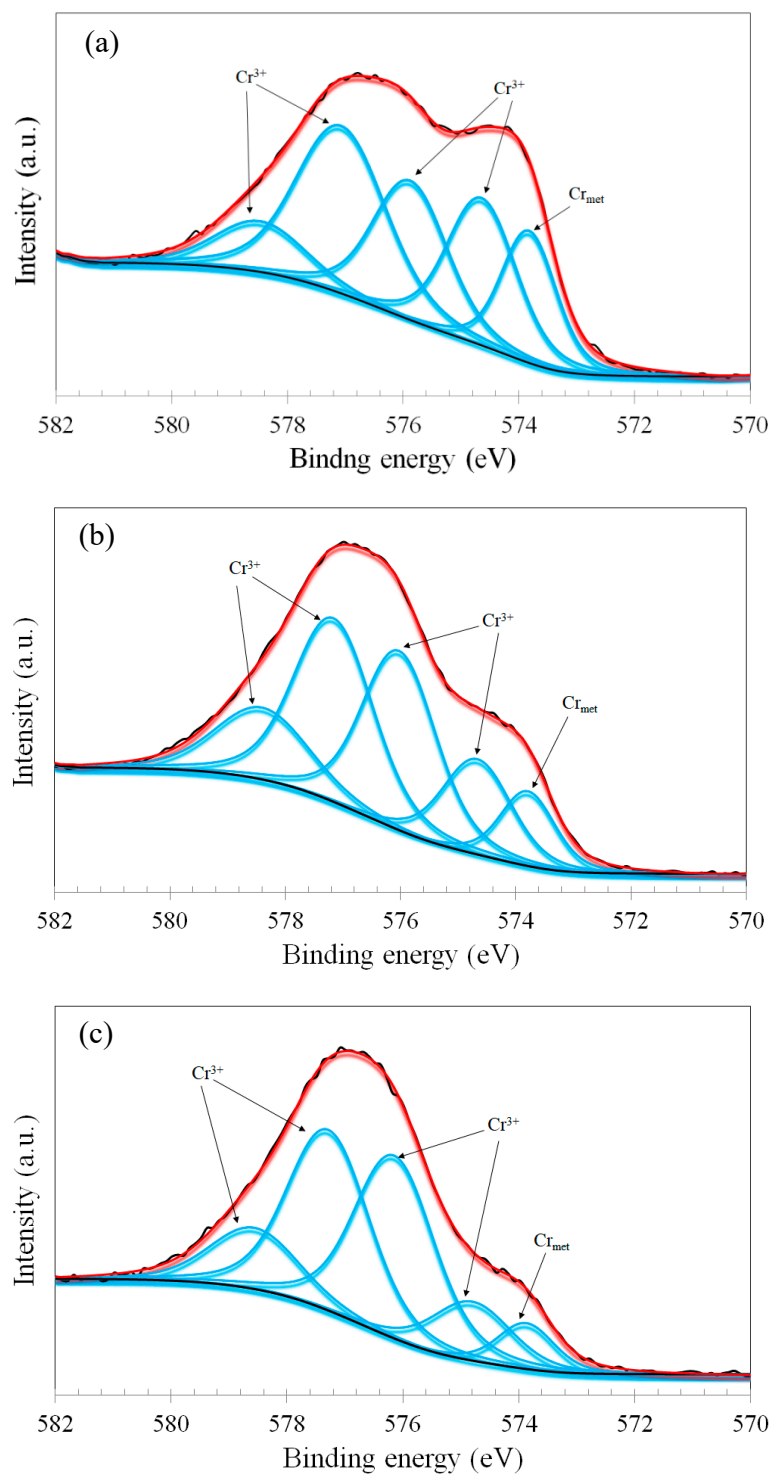

Figure S2. XPS narrow scan spectra in the Cr 2p<sub>3/2</sub> region: a) naturally formed passive film; b) wear track of the OCP sample; c) wear track of the -100 mV vs. OCP.

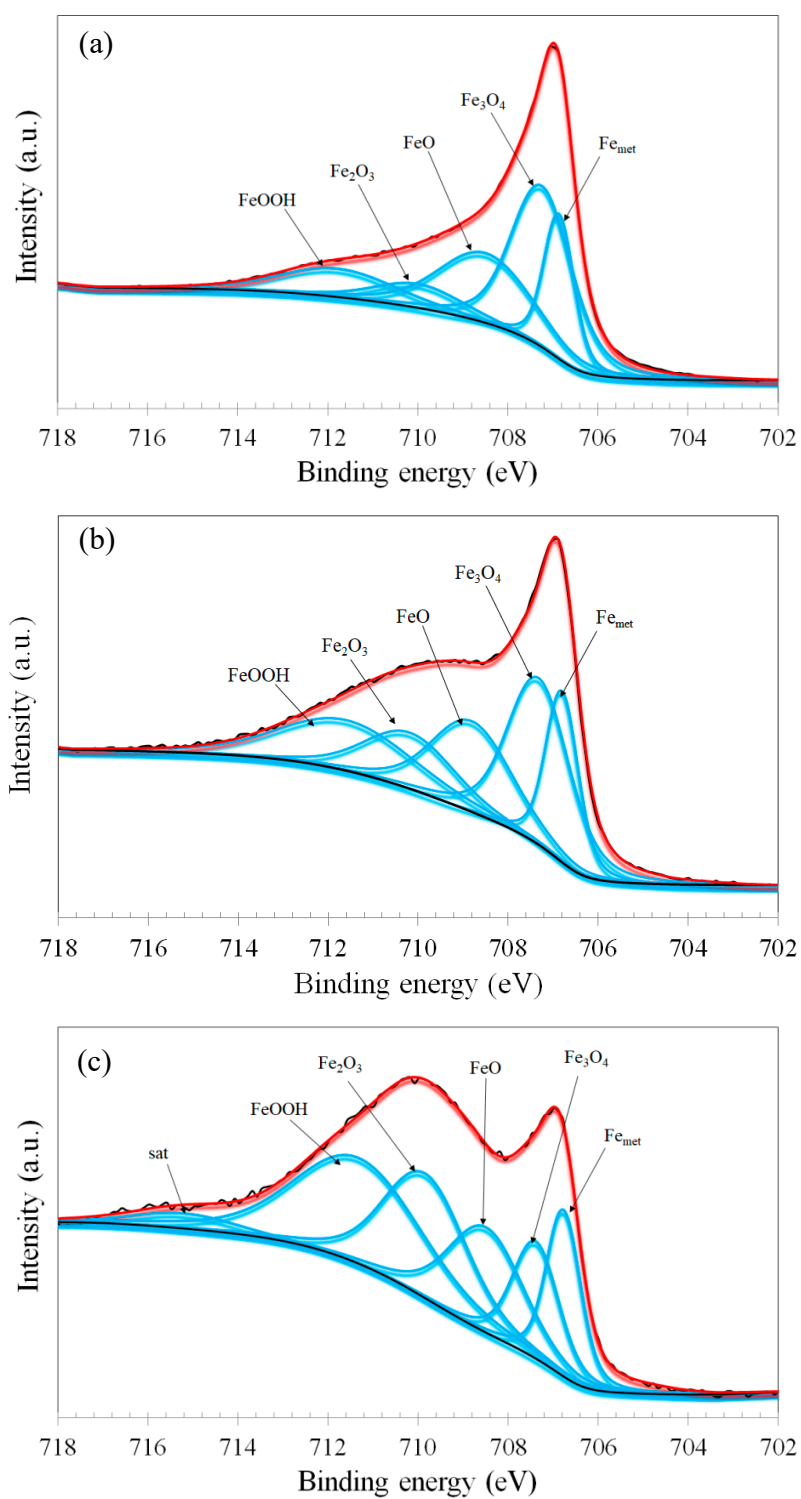

Figure S3. XPS narrow scan spectra in the Fe 2p<sub>3/2</sub> region: a) naturally formed passive film; b) wear track of the OCP sample; c) wear track of the -100 mV vs. OCP.

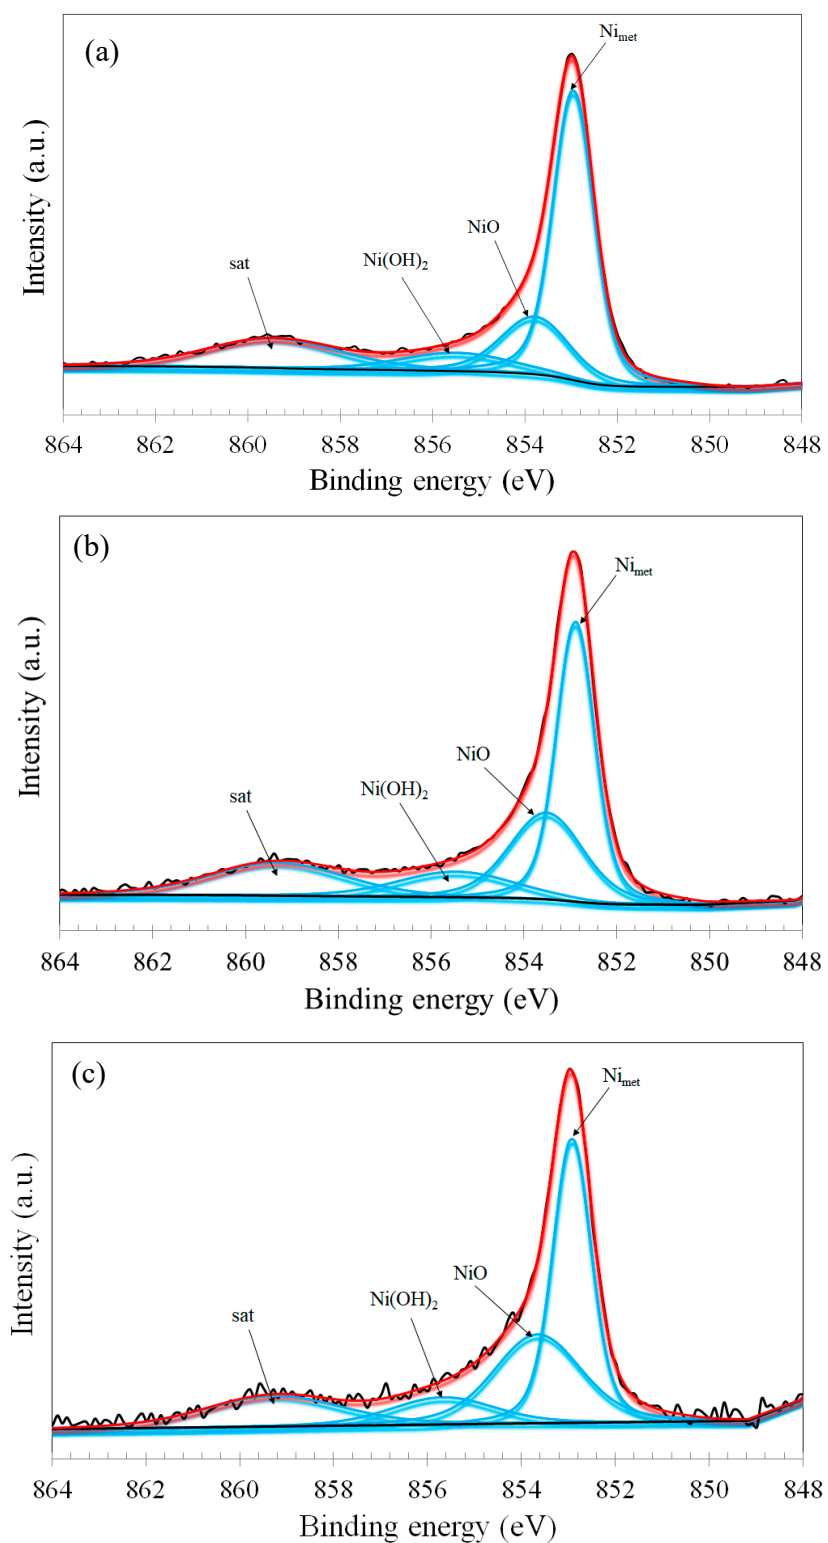

Figure S4. XPS narrow scan spectra in the Ni 2p<sub>3/2</sub> region: a) naturally formed passive film; b) wear track of the OCP sample; c) wear track of the -100 mV vs. OCP.

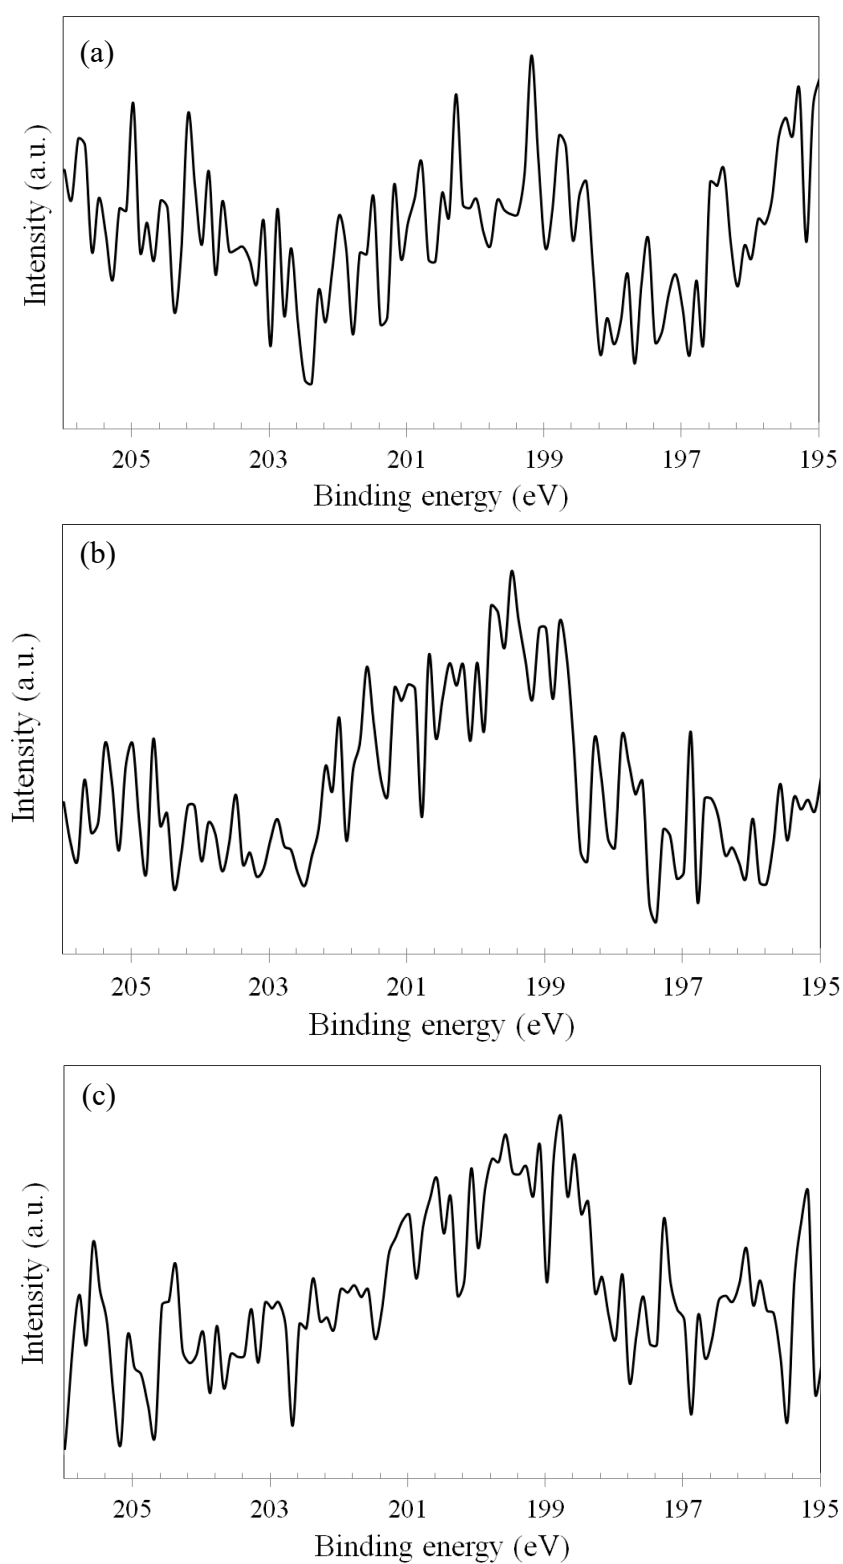

Figure S5. XPS narrow scan spectra in the Cl 2p region: a) +200 mV vs. Ag/AgCl; b) +700 mV vs. Ag/AgCl; c) -100 mV vs. OCP.
